# Supplementary material
Source: PubMed Central journal article supplement (PMC1382269)
Supplement: NIHMS7260-supplement-Supp_Fig.pdf [file NIHMS7260-supplement-Supp_Fig.pdf]

**TM1**  
 OPSD\_BOVIN  
 OPSD\_HUMAN  
 OPSB\_HUMAN  
 OPSG\_HUMAN  
 OPSR\_HUMAN  
 A2AB\_HUMAN  
 B2AR\_HUMAN  
 CKR5\_HUMAN  
 TSHR\_MOUSE  
 OLF1\_RAT  
 PF2R\_SHEEP  
 GRHR\_HORSE  
 AA1R\_CHICK  
 ML1C\_XENLA  
 VG74\_KSHV  
 AG2R\_MELGA  
 OLF2\_CANFA  
 DADR\_MACMU  
 PAFR\_CAVPO  
 FSHR\_PIG  
 EDG4\_MOUSE  
 TA2R\_CERAE  
 L4R2\_RAT  
 TRFR\_CHICK  
  
 36 **Q Q A V V A W A G H E S F L P I Q V R G K R S Y**  
 37 **F F F Y Y T V A Y Q E G Q T Y Y R R Y H D L R Q**  
 38 **S S Y H H A V R R H D K A S T I D I T D V I A V**  
 39 **M M L L L A G L F V L I A A W M L L L I V A T V**  
 40 **L L Q T T I M L L F S R Y L N V F T F L V S G T**  
 41 **A A A S S A G P R Y I V I A V P Y A P R V P T I**  
 42 **A A A V V A I P I A S T S V G T A C I V A W A L**  
 43 **Y Y F W W A V L V L F V I V I V L F V L L F F L**  
 44 **M M M M I M Y V F S T E L L Y F L Y I G A L V**  
 45 **F F G I I T S S W L I F V I S S L S S W L A L L**  
 46 **L L T F F F L L F S I F L F L I A L I F T S L L**  
 47 **L L V V V L I V V M F L I T I I M L I I V F A I**  
 48 **I I F V V I V F S Y M F A I F F Y I F S S C A C**  
 49 **M V L I T L L I L L T L L V L I V L V I V V L G**  
 50 **L L I A A F A F L T V L V V I I T S L L L V L L**  
 51 **G G G S S T I G A T G S S D N G T T G A V G G G**  
 52 **F F F V V I V F L V I T V V V I I L I I L L L I**  
 53 **P P P F F F F V L L L T P L L F L L I T L A P V**  
 54 **I I L T T G G G G G S F G G G G G G A G T S G G**  
 55 **N N N N N N N N N N N N N N N N N N N N N**  
 56 **F F A G G A V M I L S A I I G S L T G I L L G I**  
 57 **L L M L L L L L F I L S L L L L L L Y I L L F M**  
 58 **T T V V V V V V V I A F V V V V I V V V A V V**  
 59 **L L L L L I I I L I I L I I T V I C L L I L V V**  
 60 **Y Y V A A L T L L I A L W L Y I V A W V A S W L**  
 61 **V V A A A A I I L I K A S I V L A V I A V S V**  
 62 **T T T T T V I L L I L L V V F I I v F L I . L V**  
 63 **V V L M M L A I L H M H K L C y Q I A I a . A .**  
 64 **Q Q R K K T K N T L K K M R K m L r R T r . G .**  
 65 **H H Y F F S F C S D A W N N . K d H I s R . w .**

**TM1**  
 Sc  
 Sb  
 Sca  
 sk  
 Su  
 Km  
 Kl  
 Kw  
 Ag  
 Cg  
 Yi  
 Pa  
 Dh  
 Zr  
 Ca  
 Sp  
 Al  
 An  
 Cp  
 Mg  
 Gz  
 Fv  
 Sm  
 Nc  
  
 44 **L L I F Q L L Y A L Y F Y Y I I V V F V F**  
 45 **V V V V V V V I V Y V Q E L L L Y R R N N**  
 46 **N N N N R H D N K Q A T R H Q R F R R G N**  
 47 **S S K K T E T E G N S D D Y Y D L M E M M**  
 48 **T T K K T N R N L R S Q R M S N A M I L L**  
 49 **V V I I M I V V L L F A L I I T F V T V V**  
 50 **T T T T N T T M R R H K L R R N N N S S S**  
 51 **Q E E Q Q Q Q L I L Y I T L A Q T T I I T**  
 52 **A A A G A A G G A A I A G G C S A T C A T**  
 53 **I I I I I I I V I I V I I I I I I I I I I**  
 54 **M M M L V I L F V L V V T N N A G N N N N**  
 55 **F F F F F F F T H F Y M L Y Y Y Y Y Y Y**  
 56 **G G G G G G G G G G S G S G A G S A G A A**  
 57 **V V V T T T A V V V I A A A C T T T T T**  
 58 **R R R R R R R K R R A T Q Q Q Q Q Q Q Q**  
 59 **C C C I I I I I L V I I L L L L I L F I I**  
 60 **G G G G G G G A G G G G G G G G G G G G**  
 61 **A A A A A A T A A A A S L A A A A A A A A**  
 62 **A A A A A A A A I A C C G C S S C C C T T**  
 63 **A A I G G G L A F V L S V A V L F L V F F**  
 64 **L L L L L L L L M L T M L V I T I I I I I**  
 65 **T T T A A A T A T T L T T L L M M M M M**  
 66 **L L I I C L I L L L S L I F F I L L L L L**  
 67 **I I I I Y I I I I I I I I L L V I L V I A A**  
 68 **V V V V Y V I I I I A A F M V I I V V T I I**  
 69 **M M M L Y L M L L M M L L V L L L L L M M**  
 70 **W W W V W W Y W F H Y W I C L V L L L L L**  
 71 **M M M V M M M I L F A S L L L L T V I L L**  
 72 **T I I V S V V V S I V S I L L L L M M M M**  
 73 **S S S S V S S S T S S T C M S T T T T V T T T**

**TM1**  
 STE3\_YEAST  
 C59B44  
 MAP3\_SCHPO  
 C9UVN2  
 O74282  
 O74284  
 C9UVN4  
 BAR3\_SCHCO  
 O74283  
 BAR1\_SCHCO  
 C9Y7E7  
 BBR1\_SCHCO  
 C9UVN3  
 PRA1\_USTHO  
 PRA1\_USTMA  
 C9C1Q9  
 C9HEX9  
 C9PH2  
 C9HDG3  
 PRA2\_USTMA  
 C9UV52  
  
 1 **M M L D D . . D D D D . . . . . G T**  
 2 **S T P P P M M P P P P . . M M M M M M K A**  
 3 **Y Y I T S K K T T L T M M L L L G H G E E**  
 4 **K K G Y Y Y Y Y Y Y Y H R D D H E D E N N**  
 5 **S S I P P P P P P P P P P Y H H P A L A V A**  
 6 **A T F A A A A L L L L E E V I D F S F S I**  
 7 **I I Y F F L L F F F F M T T Y Y L Y F Y**  
 8 **I I Q P P P P P P P A P P P P I V I G G**  
 9 **G G F V I V V T I I T P I F F F F I F V V**  
 10 **L L Y L F F F F F F F V C F F W F F F L L**  
 11 **C C A S A A A A S A A A A A A N C S C C C**  
 12 **L S Y F F I I F F F F F L L L L G L L L**  
 13 **L L F I L L L L L L L L F V T I I I L I**  
 14 **A A A G G G G G G G S A A A A G G G A T**  
 15 **V L L F F A A F F F F A A C F L F I F G A**  
 16 **I I V V I L L V I V V A I I F V L L L C C**  
 17 **L S L L L L L L L L S L L L L C L C I L**  
 18 **L L S V V V V A S A S L V V V V S V S S S**  
 19 **A F I L L L L A I L A L L L L I L I T I**  
 20 **P P P I I I V I L V L I F M L I L I S S**  
 21 **P P I P P P P P P P P A P P P P S S**  
 22 **L L L L L L L L F L L L L L F A S L S C L**  
 23 **A A Y P P P P S P P P P G A P I P I L P**  
 24 **W W M W W W W W W W W W W W W L W I V**  
 25 **H H Q H H H H H H H H H H H H H H H**  
 26 **S T L L L W W L L I W W I I W W W L V**  
 27 **H H R Q Q R R Q Q Q R R R K R K R K Q R**

TM2  
OFSD\_BOVIN  
OPSD\_HUMAN  
OPSG\_HUMAN  
OPSR\_HUMAN  
A2AB\_HUMAN  
B2AR\_HUMAN  
CKR6\_HUMAN  
TSHR\_MOUSE  
OLF1\_RAT  
PF2R\_SHEEP  
GRHR\_HORSE  
AA1R\_CHICK  
ML1C\_XENLA  
VG74\_KSHV  
AG2R\_MELGA  
OLFD\_CANFA  
DADR\_MACMU  
PAFR\_CAVPO  
FSHR\_PIG  
EDG4\_MOUSE  
T2R1\_CERAE  
L4R2\_RAT  
TRFR\_CHICK

100 H H N Y S L M . T S S T G Q F E S A Q T P A Q Y  
99 L L C V V L L A Y Q A I I F M M Q I N H P A R L  
98 S S S Q Q E I A L M Y N N I L A M E S I G H S S  
97 T T A N N N H A D N V W I A V T N A Y D T Q L E  
96 Y Y V V V A A Y V Q F M I I E Y Q O V Y V H S F T  
95 L L F V I L A H S L V G I L A A L A V S F V A I  
94 T T V S S S G A A L A D A I L A L K I A M V V N  
93 T S P I I F F W I K I L L V L W K W W I L I F P  
92 T T F T T P P F L P T P P P S L P P L L F A L L  
91 F F V S S I V P L M G M I Y I P M M P L L G P G  
90 G G S A A I V V L T N V V P S L T V L L Y T T A  
89 G G F I I L A T Y V I I L Y L T V L T Y A V L A  
88 F L I V V T L L V S L L A V C I S V I I M L L V  
87 V V C T T A G L G S H T G A L L S A L G G L L L  
86 M M L E E V M F M F G E V V S F F V F I A G V V  
85 F F L A A L V F C C F L A V N C C L L C F L A M  
84 L L F L L I L L F L F L V L L L L L L L F G L  
83 D D G D D D D D D D N D D C D D D D D D D D  
82 A A G A A A A S A S T A A A I A S S A A A T A A  
81 V V F V V A C I F F I L V I G L F V V F A L L V  
80 A A S A A A A A S V T A S L A S A T A A V A A  
79 L L V L L L L L L L L L L L L L L L L L L L L  
78 N N N N S S N N N A H S S L N N S N N N G H S  
77 L L V V V T L C S S K V V I L S I V C G C L V  
76 L L L L L I L M L A L I V D L L V M M L L V L  
75 I I I I F F Y L F L L F F I F F F L L F L Y  
74 Y Y W W L Y I F L L V C L A I L F I F Y T T C  
73 N N N N N D R Y L K F N G S Y N . R Y L . N  
72 L L L L Q T T P M F M T G A A M T K . I F . T  
71 P P P P P V M V P S K A A R V P v I P P S . P  
70 T T Q H H A T S T T S S D N S T T s E V Q s A t

TM2  
Sc  
Sb  
Sca  
sk  
Su  
Km  
Kl  
Kw  
Kv  
Cg  
Yl  
Pa  
Dh  
Zr  
Ca  
Sp  
Al  
An  
Cp  
Mg  
Gz  
Fv  
Sm  
Nc

108 S S S S S G G S S S S S S S S S R R D E D D D D  
107 S S S A S A G A S S A R S N Y A V S M L T T T  
106 Y Y Y Y Q F F F F Y F Y L L S F F F M F F W W  
105 N N N D S N N P G N P A P P N G N G T Q V H H  
104 S S S G S H S T G S G E G G S T G T S S S S S  
103 L L L L L L L S L L L F M L C S T T T S P P P  
102 L L L L I L L L L L L M F N I F F Y F H W Y F  
101 Y Y Y Y Y Y Y G Y F T F Y T Y F Y F F Y F F  
100 K K R R K G S G S H R C A N V S L I I I L L L  
99 F F F L F L L L L F F V L L I L V C V S G S A  
98 Y Y N F Y Y Y V S Y T Y Y N Q D S L L L L L  
97 L L F L L V L L L L L M L C L C C L L L L L  
96 A A A S A S A A I A A I A G I G L L T L L V V  
95 S S S S S S S S G S A G S S A L L I C M M V V  
94 H H H H Q Q Q H H H H H E R R R R R R R R R R  
93 L L L L I I V F I I I I I L I A G I C V I I  
92 I I L L F I I V M I L M I C I F F I C A L L  
91 I I I I L T T V T V L M M G M N N N S S C N N  
90 L L L L L L L F L L M T I I A A L L V I V L I  
89 F L F F V V V F L M I A A L V L L V V V V L C  
88 L L L L L L L L L L L M M L I L L L L L L L L L  
87 S S S S S T S S S S S C T I S A A A A S G G A  
86 V V V I I T S V I V M V L L A S L V A T L L L  
85 Q Q Q Q Q Q Q L Q M Q E Q S S V S A T I V L L  
84 N N N N N N N N N N N N N N N N N N Q H S S  
83 I I I I L I I S V I A L L L F L L L I L L I I  
82 I I I I I I I I L V V Y V V W M I I I I I  
81 F F F F F F F Y F F F F F F F F F T M N T T  
80 I I I I V I I I I L L I L V V L V F S L L  
79 P P P P A P P P P I V P F P S C P P P A P P  
78 T T T T D T T T T K K S T L H S S S I L L  
77 K K K K K K K R K T R R K K V A R R R R R R  
76 R R K R K K R R K W R K K Y R R R R A R R K K  
75 S S K N K N N N R T N N N K K K K F F F F F

TM2  
STEB\_YEAST  
O59844  
MAP3\_SCHPO  
C8UWN2  
O74282  
O74284  
C8UWN4  
BAR3\_SCHCO  
O74283  
BARI\_SCHCO  
C8Y7E7  
BBR1\_SCHCO  
C8UWN3  
PRA1\_USTMA  
PRA1\_USTMA  
C8C1Q9  
C8HEX9  
C8PBH2  
C8HDG3  
PRA2\_USTMA  
C8UVE2

58 D D Y A A I L A S A A A Y A T Y S D S L L  
57 D I P N N S S N N D N S N T T N G Y G S R  
56 D D N G G G D G D G G D S K G N S N N H  
55 S S S H H A A K K A R A A W W A Y N Y N N  
54 W W W W W W W W W W W W W W W W W F F  
53 I V I V I V V V V A V I L A V I I W I A A  
52 A A A I I I I I L V V V I V M I I I I L L  
51 A A S S S T T S S S S A S S S T S G S A A  
50 D N E N N N N N N N N N N N N D N N N  
49 V V V I I V V V I I V I V V I V I V I V  
48 I I V F F A A F F F G G F F F F F G G  
47 C C Y F L Y Y Q G Q S Y Y N N G Y F Y K K  
46 T T I N N I I N N N I I I D D C V I V N N  
45 L I L L L V V L L L L M I L L L L L L V F  
44 N N T C C N N C C C C N N N N N N N L L  
43 M M T G G M M G A G A M S G G A T A T G G  
42 T I L L I V V L L L T I V F L F S I S T V  
41 L L T A A F F A G A A F F F M T S F S F F  
40 L L L T L L T T T T L L L L L V L V C C  
39 W W W W W W W W W W W W Y W W W W W W  
38 T T F I I A A V I M L A I L I V F T F F S  
37 I I L M M I I M M M I S S S V I I I M M  
36 L L L Y F I I F F Y I L L L L L L L M M  
35 I I L L L S S F A F A S S T M S C L C L L  
34 I I L C C L L C C C C L I I V L L L L I  
33 A A C T T T T T T T T T T L T P T P V V  
32 P P P G G A A G G G G A P G G A A G A G G  
31 I I I S S V V S S S S V I V V I V A V I T  
30 N N N N N N N N N N N N N N N N N N N  
29 K R R W W R R W W W W G K R K R R R R K G  
28 T S A A A A A A A A A A S S A Y A Y A A

**TM3**  
 OFSD\_BOVIN  
 OFSD\_HUMAN  
 OFSB\_HUMAN  
 OFSG\_HUMAN  
 OFSR\_HUMAN  
 A2AB\_HUMAN  
 B2ARL\_HUMAN  
 CKRS\_HUMAN  
 TSHL\_MOUSE  
 OLF1\_RAT  
 PF2R\_SHEEP  
 GRHR\_HORSE  
 AA1R\_CHICK  
 ML1C\_XENLA  
 VG74\_KSHV  
 AG2R\_MELGA  
 OLF2\_CANFA  
 DADR\_MACMU  
 PAFR\_CAVPO  
 FSHR\_PIG  
 EDG4\_MOUSE  
 TA2R\_CERAE  
 L4R2\_RAT  
 TRFR\_CHICK

110 C C C C C C C C C C C C C C C C C C C C P C C C  
 111 N N A V V E E Q N L S K L Q R K L N N D A R K L  
 112 L L L L L V F L T T I V M I L L T I L A T F A C  
 113 E E E E E Y W L A Q F L M S E A Q W A A G M V I  
 114 G G G G G L T T G L G S A G I S M V G G P G Y T  
 115 F F F Y A S G F Y I Y C F F A Y A C F A V Y Y  
 116 F F L T T L I L F F C L P L F G F F L F G V V L  
 117 A A G V V D D Y T Y M K V M Y I F D F T H M C Q  
 118 T T T S S V V F V L V L L G Y S L I F V Q I A Y  
 119 L L V L L L L I F Y F F I L L F F M I F P F L L  
 120 G G A C C F C G A F S S L S Y N F C N A H F S G  
 121 G G G G G C V F S A G M T V V L G S T S G G M I  
 122 E E L I I T T F E D L Y E I Y Y D T Y E V L Y N  
 123 I I V T T S A S L L C A S G L A L A C L S S A A  
 124 A A T G G S S G S E P P S S D S E S S S G P S S  
 125 L L G L L I I I V S L A I V I V S I V V H L V S  
 126 W W W W W V E F Y F F F L F F F F L A Y T L L F  
 127 S S S S S H T F T L L M A N S L L N F T A L L S  
 128 L L L L L L L I L L G M L I V L L L L L G G T I  
 129 V V A A A C C I T V S V L T V T V C G T I A G T  
 130 V V F I A V L V A L V A A C C A V V A A T L A  
 131 L L L I I I I L M M I I I V L M I I I V M L F  
 132 A A A S S S A T T A A S A A S S A S T T E A S T  
 133 I I F W W L V I L Y I L V I L I Y V Y L R S L I  
 134 E E E E E D D D E D E D D N V D D D N E H E Q E  
 135 R R R R R R R R R R R R R R R R R R R R R R R  
 136 Y Y Y W W Y Y Y W Y C S Y Y Y Y Y Y F W S F C Y  
 137 V V I M M W F L Y V I L L C L L V W Q H v L L I  
 138 V V V V V A A A A G A R Y L A A A A T a G A A  
 139 V V I V V V I V I I V I V I V I I I V I V I V I  
 140 C C C C C S T V T C T T K C . V C S K T Q T T C  
 141 K K K K K R S H F F K R I H . H F S Y H I R R H

**TM3**  
 Sc  
 Sb  
 Sca  
 sk  
 Su  
 Km  
 Kl  
 Kw  
 Ag  
 Cq  
 Yl  
 Pa  
 Dh  
 Zr  
 Ca  
 Sp  
 Al  
 An  
 Cp  
 Mg  
 Gz  
 Fv  
 Sm  
 Nc

125 V V V V L I K V I K I S Y F V Y L Y I Y F M M  
 126 H H H H H H H R R S D R I H A A A R A A S Q  
 127 V V V V V L L L L I V L V S V G T N R P R I I  
 128 Y Y Y Y S V Y F F Q S S T S N Q S T S S S S S  
 129 G G A G A G G A V D V A V D I V I F V V V V V  
 130 A A A A A A A A A A A A V L M V L A A A A A  
 131 T T A T A A V T T A T T A T I A G G A G A A A  
 132 N N S N N T N N S N N N N L S A A T N N T T  
 133 I I I M I L I I I V V V G L V I I V T V V V  
 134 I I F I L I A S V F I F F L F M L F M M L L  
 135 Q Q Q Q Q Q Q M Q M Y Q K A F T H A S S S S  
 136 V V V V C C V V M V T C P T A A P L L I I  
 137 L L L L L L L S L L I I V I L L L C L P P  
 138 L L L L L L L L L M L L L I V L L Q L L V V  
 139 V V V V V V V I V I V Y I L L L L V V T T  
 140 A A A A T A A A M G A A F I T I A I A A  
 141 S S S A S C A S A S L C L T C T C L S I L L  
 142 I I I V I I V I V T I V A V I V V I L L  
 143 E E E E E E E Q E Q E E E E E E E E L L  
 144 T A I I T V A V A L A V I M A I V A T L S S  
 145 S S S S S S S S S S S S S S S A M A A A  
 146 L L L L L L L L L L M L M L L L L L L L L L  
 147 V V M I V V I V A T T G M V V L M M M M M  
 148 F F F F F F L L F V Y Y F I L L F V S N V V  
 149 Q Q Q Q Q Q Q Q Q Q Q Q Q Q Q Q Q Q Q Q  
 150 I I I V V V V I T V I V V V V T A A A A A  
 151 K K R R R R R H H R H F Y R Q Q H W W W W W  
 152 V V V V V V I V S I I V I V V A T T S S  
 153 I I I I I I M V V I M I V V L M M M M M  
 154 F F F F F F F F F F F F C C C C V V V M M  
 155 T T K K K K Y R T H R R K A S S S E R S Q Q  
 156 G G G G S A S A I A G S T H N N T L L L L L  
 157 D D D D D D D G E W P P S D L L I W W W W W  
 158 N N N S N R T T N L S E N R L R R P P P T T

STE3\_YEAST  
 C59844  
 MAP3\_SCHPO  
 C8UVN2  
 074282  
 074284  
 C8UVN4  
 BARS\_SCHCO  
 074283  
 BARI\_SCHCO  
 C8Y7E7  
 BBR1\_SCHCO  
 C8UVN3  
 PRA1\_USTHO  
 PRA1\_USTMA  
 C8C1Q9  
 C8HEX9  
 C8PH82  
 C8HDG3  
 PRA2\_USTMA  
 C8UV52

69 C C C C C C C C C C C C C C C C C C C C C C  
 70 D D D D D D D E D E D D D D E E D D D D D D  
 71 I F I I I I I I I I I I I V L I I I I L V  
 72 V V T S S A A S S S S T V S S S V A V S S  
 73 I I S T T T T I S I S T T I V S T S T A A  
 74 K K R R R R K K R K R K K R R R K K K I V  
 75 L L I F L L L I L I L L I L L V L L L I V  
 76 Q Q V V I I I T I L L T Q R R P I F I E E  
 77 V V T V V I I M I M L I I H H L L I L R R  
 78 G G C G G G G G G G G G G A L L G G G T I  
 79 A A S L I A A L V A V G A L L V S V S W W  
 80 N N S S S S S S S S S N T Y F G V P V Q Q  
 81 I I I V V H H V I V I F L I I Y T V T F L  
 82 G G G A A A A G G G G G A S A A A G G G G G  
 83 I I I I L L L I I I L L I I I E I E L L  
 84 S S P P P P P P P P P P P P P L S L C C  
 85 C C A A A L L A A A A A A A L G A G C C  
 86 A A S A A A A S A S S A C S S C A T A S S  
 87 V V A S S T S T S G C C N N S T S T A S  
 88 T T F L L L L L L L L L L L L A L A L L  
 89 N N T C C C C C C C C C V A S A C A C C  
 90 I I L I I I I I I I I L L I I Q I I I V V  
 91 I T V N N C C I S I S C C A A M T T T L L  
 92 Y F L R R K K R R R R I I R R R H R H Q Q  
 93 N N Y R R H H R R R R R H R K K R Y R R R  
 94 L L L L L L L L L L L L L L L L L L L L L L  
 95 H H D Y Y E E Y Y Y E E E E E S V S E E  
 96 T Q T K K M M H A Y K R R S S S K M K G S  
 97 I I V I I V I L I I V I I I V I I I I I  
 98 L L I A A S S A T A S A A A A M A M A A  
 99 K K R S S S S K S K S S S S S S K S K S S  
 100 A A R C C S S V V V M V T T T T P S P L L  
 101 D E D R Q R R R S R R R R R R R S T S R R  
 102 S N H T T T T A T A S A A Q Q R Y A Y Q Q

TM4  
 OPSD\_BOVIN  
 OPSD\_HUMAN  
 OPSB\_HUMAN  
 OPSG\_HUMAN  
 OPSR\_HUMAN  
 ASAB\_HUMAN  
 B2AR\_HUMAN  
 CKR5\_HUMAN  
 TSHR\_MOUSE  
 OLF1\_RAT  
 PF2R\_SHEEP  
 GRHR\_HORSE  
 AA1R\_CHICK  
 ML1C\_XENLA  
 VG74\_KSHV  
 AG2R\_MELGA  
 OLF2\_CANFA  
 DADR\_MACMU  
 PAFR\_CAVPO  
 FSHR\_PIG  
 EDG4\_MOUSE  
 TA2R\_CERAE  
 L4R2\_RAT  
 TRFR\_CHICK

178 Y Y F Y Y . . Q . . . L . . F . K N Y . L W N  
 177 R R R R R D Y S S R Y M N L D I . H T S . L L L  
 176 S S S S S G W R S A F R N S G N . W S S H G H D  
 175 W W W W W K H T I M R F W G S R . S D I W F R L  
 174 G G G G G Y M F G L D I G V L H . L M G F A Y L  
 173 V A F F F I Q I V L E Y F F V I L Q V F H V V F  
 172 L L F I I L I I M T W L M F L I T V L I A D A F  
 171 P P P P P P G P H D Q P N A V H P F P P G A W  
 170 P P P P P L P L L K P T P I P L I Y F L S P L  
 169 A A I A A L F L L M I G L V L L V F S L L E V M  
 168 A A S T T S S S A A Q A G I L S A S A A G A A C  
 167 C C V W W I T A L H D F V A A A H I A V L G L Y  
 166 A A G V V V L F L F T I L I A V F L A T G L V V  
 165 L L I A A A G V F T K S F I S G M V V F L T L S  
 164 A A G A S A S A C T Y S S T T A T S I A A L A A  
 163 M M I W W I V V S L F L V L L L L L A F A F A F  
 162 V V T I I L I V V V C L I I V L V T V I A C L S  
 161 W W W W W W W W W W W W W W W W W W W W W  
 160 T T T S S V V T G S T A C T G I S A I G V S V V  
 159 F F A F F T M I G L R L C L L V L V V V G G G F  
 158 A A L A A L L V A V S G A G S I V S L L V P L I  
 157 V V V I I I I S M V A I I L Q C L I S M I Y L I  
 156 G G V G G I I T I L Q M A Y K T L L L I L Q L I  
 155 M M T V V C V V T S I S V C K V S I A S T V R K  
 154 I I L I I K R V Y V K R A W P R F F I A V T R K  
 153 A A A A A I A G A C Y G A T W A C A G A V Y A A  
 152 H H H L L R K F H L D L R S S V L a R H R R L R  
 151 N N K K K R N T R K R K R R R f k r k r G G A S  
 150 E E S A A P K V L P H S P Q T r t e a k . L P F  
 149 G G S D D T T T R S G N T N S S Y Y T C R G S T  
 148 F F F F F R L R I M L S V Y Y K H R K Q P L R C

TM4  
 Sc  
 Sb  
 Sca  
 sk  
 Su  
 Km  
 Kl  
 Kw  
 Ag  
 Cg  
 Yi  
 Pa  
 Dh  
 Zr  
 Ca  
 Sp  
 Al  
 An  
 Cp  
 Mg  
 Gz  
 Fv  
 Sm  
 Nc

193 Y Y Y Y Y Y Y Y Y H R Y Q S L M L I L L L L L L  
 192 T T T V F V V V L T L F F L I I T A V N I I  
 191 V A A S E V S A G P A M R Y V A A S A A N N  
 190 I I I T V I K M R H I R I O M R R K N K E K  
 189 M M I M L I I V I T N A H I C I C V N N A A  
 188 G G G S Y S S S L L S S S Q N N N T Q Q Q Q  
 187 K K K K K K K L K V M S L Q M V E V I H F F  
 186 V I I V I I I V I I V I C V A I A I V I I  
 185 A A A A A A A A A C A T T M S L T A T T C C  
 184 S S T T T T S S A S Y S L N Y L Q S Y F N N  
 183 V V V I V I V A V I N N T T S M A A A A A  
 182 F F F F F M L L L I F I I I L Y L C L I F F  
 181 Y Y Y Y W W F Y Y T Y Y Q W R R R K R R S S  
 180 M M M M M M L F T H L F F F V I C F V S L M  
 179 T V A V V A V C A T V G A A G A G A S A V A  
 178 V V V V V V V T V V T T V V L I I I V I I V V  
 177 T T T T T T T T T W S I V V P T A T A T T T  
 176 A A A T T A V T A F A T I L V A A V M L A V  
 175 I L L F F A T F L V L L L V L T L T I L V L  
 174 G G G G G G A G G F G G G T A A V A S T S S  
 173 L L L L L F L I M V L A L L A V L L V V L L  
 172 T T T S V A S L I A V L A G C L V V I I T L L  
 171 F S S A A A T A I L G A I A T A V L L G G G  
 170 S S S S S S S S S S S C A S S S S S S S S S S  
 169 I I L I I V I V I L V V L I A V F F V A V V  
 168 S S A S G G A A S L A I L V G C S A G A L L  
 167 T T T T S T V T L I V T S T L L L I A A A V  
 166 L L L L L L L L V L M L A M L L A G I V V V  
 165 M V I I I I F I G A A M I L A L S I I L L  
 164 L L T R N I R I E V F A I R I R R V Y Y A A  
 163 G G G G G G G G R T G G G Q R R R K K K R R  
 162 I M I V I I V L I V V L W T Y Y Y W W W W W  
 161 R K R G R K P R L Y N R I Q I A A V V L L  
 160 K K K K K R K R K R I R K K K R R

TM4  
 STE3\_YEAST  
 O59844  
 MAP3\_SCHPO  
 Q9UVN2  
 O74282  
 O74284  
 Q9UVN4  
 Q9UVN3  
 O74283  
 BAR3\_SCHCO  
 BAR1\_SCHCO  
 Q9Y7E7  
 BBR1\_SCHCO  
 Q9UVN3  
 PRA1\_JUSTHO  
 PRA1\_JUSTMA  
 Q9C1O9  
 Q9HEX9  
 Q9PHI2  
 Q9HDG3  
 PRA2\_JUSTMA  
 Q9UV52

140 Y Y Y Y Y Y Y F F F F F F Y Y Y Y Y F Y L L  
 139 R R R R R R R R R R R R R R R R R R R R R R R R  
 138 F F N H H H H H H H H H H N N H A H A Y Y  
 137 V V S G G G G G G G P G G T S G P A P P P  
 136 Q Q E Q Q Q Q Q Q Q Q Q Q Q Q Q Q Q Q Q Q  
 135 L L L V V V V V V V V V V V N N V V V V V V V  
 134 L L P V I I N I V I I V I V V I I I I V  
 133 Y Y V Y F Y Y Y Y Y V Y Y I I Y Y Y Y F F  
 132 S S M Q Q H H Q H Q H H H M M Q H H H F F  
 131 F F M L L L L M L L L L A L L L L L L M L  
 130 G G A P P A A A V A I A A S S V S A S P P  
 129 M M M M M M I M I M M M V T T M M M I I  
 128 V V I Q Q F F Y I Y V F Y Y Y F I V I Q Q  
 127 M A I V L I I V I V L I I L I I M L M L L  
 126 V T L L F M M L A L I I M V I V I V I A F  
 125 P P P P P P P P P P P P P P P P P P P P P P P  
 124 T T L I I L L F I F I L L L I L P M P L I  
 123 F F L G G V V L G L G L I G G L G G G G G  
 122 L L I L L F F V F V V W W V L L F I F L L  
 121 S S S G G C C C S C A C C S C C S G S G G  
 120 I I L I I M M I I I I M M I I I F L F V V  
 119 V M C A A V V L C L S A M L L I L L L G A  
 118 L L V L L G G A L A I L V L L I L L L F I  
 117 D D H D D E X D D D D E D D D E D D D D D  
 116 K T W V I F F I V V I F F I I E E V E I F  
 115 . C I M M I I I I L C I I I W I A I L C  
 114 V I E V V M M I V I I T A I V V Q L O L V  
 113 I . Y A A R R V M A A R T S A R N A N R R  
 112 K K R K R R R R R R R R R R K R R R I R R R  
 111 T K K R R K K M R M I R R K R K R H R K R  
 110 W I L K K K K K K K K K K H H R T K T R R  
 109 S S P E Q D D E D E D D S E D M I Q I D D  
 108 S N H S A S S A A A Q A T S G G K R K W T  
 107 L S D R R V V R R R R A A A P S S Q S V Y

**TM5**  
 OPSD\_BOVIN  
 OPSD\_HUMAN  
 OPSB\_HUMAN  
 OPSG\_HUMAN  
 OPSR\_HUMAN  
 A2AB\_HUMAN  
 B2AR\_HUMAN  
 CKR5\_HUMAN  
 TSHR\_MOUSE  
 OLF1\_RAT  
 PF2R\_SHEEP  
 GRHR\_HORSE  
 AA1R\_CHICK  
 ML1C\_XENLA  
 VG74\_KSHV  
 AG2R\_MELGA  
 OLF2\_CANFA  
 DADR\_MACMU  
 PAFR\_CAVPO  
 FSHR\_PIG  
 EDG4\_MOUSE  
 TA2R\_CERAE  
 L4R2\_RAT  
 TRFR\_CHICK

199 N N R G G . T W . S L S S V W L . L s . . M H Y  
 200 N N S V V E N K . F F G M S R R . S G . . L A Y  
 201 E E E Q Q A Q N Y C A Q E S L V . R N . . G A S  
 202 S S S S S W A F A A A F T Y S H G . T I M . G A P  
 203 F F Y Y Y Y Y Q K D L E M Y V L L Y T K C L H I  
 204 V V T M M I A T V N G G V T R G M A R V L S L Y  
 205 I I W I I L I L S M L F Y I T L A I C S C V S M  
 206 Y Y F V V A A K I I L S F T V S R S F I D G L M  
 207 M M L L L S S I C P A Q N V S K L S E C L L E D  
 208 F F F M M S S V L H L C F V V N C S H L D S T F  
 209 V V I V V I I I P F G V F V T L F V Y P S F L G  
 210 V V F T T G V L M F I T V V A L C I E M C L T I  
 211 H H C C C S S G D C S H W H G G A S K D S L A F  
 212 F F F C C F F L T D F C V F F F N F G I R N F Y  
 213 I T I I I F Y V D I V S L I L L T Y S D M T V V  
 214 I I V T I A V L T S C F P V L I I I K S V V L L  
 215 P P P P P P P P P N P P P P P P P P P S P P  
 216 L M L L L C L L L L A Q L L L F H V V L L V F M  
 217 I I S S A L V L A L I W L S A L F A L S F A G V  
 218 V I L I I I V L K T W L V L I F I I O S T T L  
 219 I I I I M M M A L G H M V L I C M I L R L V A  
 220 F F C V M I V V Y S I Q L T I L D I H Y S C L T  
 221 F F F L L L F I I C S A L F L T M V I V Y H G V  
 222 C C S C C V V C V S L F I C F S S T C V L V C L  
 223 Y Y Y Y Y Y Y Y L D L Y Y Y Y Y A Y I S A Y Y Y  
 224 G G T L L L S S V T K N L L A T L T V L A H G G  
 225 Q Q Q Q R R R G L H V F E R L L L R L L W G V L  
 226 L L L V V I V I L V K F V I T I K I G V A Q T I  
 227 V V L W W Y F L L N F T F W W W L Y F L L E L A  
 228 F F R . . L Q K N E R F N V C K . R F N S A A R

**TM5**  
 Sc  
 Sb  
 Sca  
 sk  
 Su  
 Km  
 Kl  
 Kw  
 Ag  
 Cg  
 Yl  
 Pa  
 Dh  
 Zr  
 Ca  
 Sp  
 Al  
 An  
 Cp  
 Mg  
 Gz  
 Fv  
 Sm  
 Nc

201 D D Q R T K T S T H G S S S D N I L F L Y Y  
 202 K K K Y K L Y L F L W W I W W W W W W W W  
 203 Y Y Y F C Y Y Y F I T V W P L L L I L L V V  
 204 F F F F Y F Y F L F R T M Y E E Q R I I R R  
 205 N N N N N N N N S N L E D D F S S S Q K H K K  
 206 A A V I I V I L I L A R I L I A L L T W W L L  
 207 S S A A A S A A A S S S P P A T A T D T M Y Y  
 208 T T T S N T V T Y I D Q F T K N T N L V V L L  
 209 I I I I I I I I I V I I I I I V I A I V A A  
 210 L L L L L L L M C L S C L L L V A L F M M L L  
 211 L L L L F L L L M L F Y F F F T L T T N N T T  
 212 A A A S A A A A A A A S S A T T T T V V T T  
 213 S S S S S S C T I S C S A I F V I V A A L G G  
 214 S S S S S S S S S S S S S S S S S S S M S S S S  
 215 I I I V I I I V V I I S I I I I I V I I I I  
 216 N N N N N N N N N S F N N I C C C T S C S S  
 217 F F F F F F F F F F I L I F F Y Y W W W W W  
 218 M M M M M I M I M A I M M H F F F W F F F  
 219 S S T T T T T T F T S S S T S C C S C C C T T  
 220 F F L L F I L L L F L V C I G A V T F A A F F  
 221 V V I L I L L L L I V I M L V V I L I I L L  
 222 L L L L L L L L L L L L L L F F F F F F F F  
 223 V V V T M S S T S V L S A I S V V V N N N M M  
 224 V V I V V V V V V I A C C G Y V T A V I I I I  
 225 K K K K K K K K K K K K K K K K K K R R R  
 226 L L L L L L L L L L L L L L L L L L L L L L L  
 227 I I I I F I F V L F V F F I F G G G I V I V V  
 228 L L L L L M L L L F T V F I R L F F M W Y M M  
 229 A A A A A A A A A A A A A A A A A A A H H H H  
 230 I I I V I I F V I I I I I I I I I I M L L M M  
 231 R R R R R R R R R R R R R K R L K R Y W I V W W  
 232 S S S S S A A S L S V T T T I M L A Q S S T T  
 233 R R R R R R R R R R R R R R R R R R R N N N S N  
 234 R R R R K R R R R R K K R R R K K R R R R R R R

**TM5**  
 STE3\_YEAST  
 C69844  
 MAP3\_SCHPO  
 C69UV2  
 O74282  
 O74284  
 C69UV4  
 BAF3\_SCHCO  
 O74283  
 BART\_SCHCO  
 C69YE7  
 BBR1\_SCHCO  
 C69UV3  
 PRA1\_USTHO  
 PRA1\_USTMA  
 C69C109  
 C69HEX9  
 C69PH2  
 C69HDG3  
 PRA2\_USTMA  
 C69UV52

149 N N S A P P P P P P A P P P P N P P P A A  
 150 L L S T T T T A V A A A S F M P W V W P P  
 151 L L F T T I I V V V I T I L M T T T T L I  
 152 S S Y V V Y Y F Y T Y Y S V F D W D Y Y  
 153 P P Q N N I I N N N I Y T L F M R P R A N  
 154 T T T T T S S T T T T S S S S S S S G S S S  
 155 W W W P P I I P L P L I I W W V W V V V  
 156 I I Y P P P P V L V P P P V L P L P L P P  
 157 T T T A A A A T A T A A A W W G A A A A A  
 158 T T L Y Y I I Y Y Y Y I I V V L V L V L L  
 159 V V L P P F F V F V F F F L L M A F A F F  
 160 L L F L L I I V L V L I I L L I A I I V  
 161 Y Y F V V V V S Y S F V I V V R V V V Y Y  
 162 T T Y F F W W Y I Y F W W A A F L T L H Y  
 163 M M I L F F F I A V M V V A A I L W L L F  
 164 W W P W P P W W W W P P P P V W W W W W  
 165 M M P P P P P P P P P P V V P P S P R R  
 166 L L C T P L L V V V L L F L I M P P P L L  
 167 I I L I L L L I L V T I I V V V L V L F  
 168 W W L I I F F I L L L M A V V V F L F V V  
 169 S S S G C A A G G G G A I S S A G T G S S  
 170 F L F L L V V M I L A A F F L V S I S L V  
 171 V V G V V I I V F I F A L A C A I I I V L  
 172 G G G S S S S S S S S S S T S S S S A S C C  
 173 A T L A A F F A F A F L F A A L A A A A S  
 174 V V F V V I I T V T V V C V V I Y G Y V I  
 175 Y Y F Y Y L L Y F Y F Y F Y F Y Y Y Y  
 176 A V C C A A S S G S A G S S A S G S A A  
 177 T C S I I A A V C V A S G V A A V I V V A  
 178 L L R L L M M L L M L L V L L L K I K L L  
 179 V V I T T A A A T A C A A A A V A V V I  
 180 L L V L L L L L L L L I L F F V I L I L L  
 181 F Y V R R H H I R L R R H R R R I R I R R  
 182 V V L E A H H E S Q A H H W W W S F S W W

**TM6** OP5D\_BOVIN  
 OP5D\_HUMAN  
 OP5B\_HUMAN  
 OP5G\_HUMAN  
 OP5R\_HUMAN  
 A2AB\_HUMAN  
 B2AR\_HUMAN  
 CKR5\_HUMAN  
 TSHR\_MOUSE  
 OLF1\_RAT  
 PF2R\_SHEEP  
 GRHR\_HORSE  
 AA1R\_CHICK  
 MLC\_XENLA  
 VG74\_KSHV  
 AG2R\_MELGA  
 OLF2\_CANFA  
 DADR\_MACMU  
 PAFR\_CAVPO  
 FSHR\_PIG  
 EDG4\_MOUSE  
 TA2R\_CERAE  
 LAP2\_RAT  
 TRFR\_CHICK

278 H H N N N C Q Q N T T D C N L I I C A K D R A L  
 277 T T N A A I I F M S S F F I L L R F L L L L V F  
 276 F F V A A A V T L F F W L A T V A P T S G V A S  
 275 I I M A A G H N A I I Y T V D D Y L W A D T Q N  
 274 Y Y Y F F L V L S K K W I A L L S I P S L Q L V  
 273 F F M C C S I L L H H I C L L F T C L I L A L V  
 272 A A A A Y N L A I I G N G N T I N Q A L I N V  
 271 V V F F S V V Y G G L L I L F I L V F V F V L  
 270 G S A F F F I I F R R V I F V V L I M F V V A T  
 269 A A A A T F F N S V V Y H N H O L F H S Q L H R  
 268 Y Y Y Y F F Y I S S Y L L Y H F H I G L Y Y  
 267 P P P P P P P P P P P P P P P P P P P P P P P  
 266 L V V G G F L A A V S T L A F I I L V A T L A M  
 265 W W Y W W W W M K W W W W C W V W F M W W W W  
 264 C C C C C C F C L C C S C F S L C C C C C L L  
 263 I I V F V L L L M I I V L V V F I C I L V V L F  
 262 L L C C C V T F F S C T A A F F L V V F V S G A  
 261 F F F F Y F F Y D A S F F F F F G F F D F A F F  
 260 A A S A A V T V T V V S L L L F G V V T A V A L  
 259 I I G L F G G I F V C T F V L F M G A F G L L V  
 258 V V V V I I M M I R M A L F V V I M L I L M V V  
 257 M M M M V I I L A I F V V V I F I V L I I I V  
 256 I I V V V I T V Y G A L V A A I V T M I G A V  
 255 I I V V V A G F A S L V A F V V V S C A V L S A  
 254 V V V V L L I M V L T L M I I L L V M V L V L  
 253 M M M M V T L R I Q M S T V M E T M R T Q L M  
 252 R R R R R F K R K I I K K L G K N K W K K A R K  
 251 T T S T T T L V A L V M A F R F V L L A V M G T  
 250 V V V V F A A I V M T I N V I Q V A I L M V V  
 249 E E E E R E R K R K F E R K R K D T K R K S E R Q  
 248 K K R K K K H H T P F L L R D D T R T L V T R  
 247 E E E E E E R D I H R E D R N S E R D T E G R

**TM6** Sc Sb Sca sk Su Km Kl Kw Ag Cg Yl Pa Dh Zr Ca Sp Al Ai An Cp Mg Gz Fv Sm Nc

T A  
 272 Q Q Q Q - S K I S S K T N  
 271 N E N N D E K R N R K G A H Q - Q N S S  
 270 P P P P S T N G K S E K E P S - V A G V S A  
 269 K K D N H K N N E D P V S D L H R D D F F S S  
 268 L L L L L L L L C V L E V L Y I S S I N H D D  
 267 S S S A A A A A A A A R G T F F F V F G A L L  
 266 Y Y Y Y Y Y Y F Y Y F Y W Y S Y Y H Y W F F  
 265 A A A A S A S A V N S N G H D Q H H Y E E E  
 264 L L L L L L L L I V V I L V I C T L L L L L  
 263 I I I I T I I I I L L I V I I I I G S G G  
 262 F F F F T Y Y L F Y I V V F L T A S S A A A A  
 261 I I L L L M L L L L L L L L I F F V F F F F F  
 260 I V I I I V V I I V I I I I T V I I L I L L  
 259 S S S S S S S S S S T S S S A A V A V V L V  
 258 P P P P P P P P P P P P P P P P P P P P P P  
 257 V V A F V G G F C I V I I A I V I I V F I I I  
 256 L L L I V I I I I L V I F I I T V I V I L L  
 255 L L L L L L L M I L L M M L L L M L M M M M M  
 254 S S S T S T T T T S S T T T T C T T S L L L L  
 253 Q Q Q Q H Q Q Q Q Q Q Q Q Q Q Q Q L I I I  
 252 C C F F C T T F T C T L T C S C C C G G A S  
 251 S S S S T S S S S F S A S S F S G G S N N N N N  
 250 M M M M M M M M M M M M M G I M M M A T T T T  
 249 I V I I I I I I I I I I I I V I I I M M M I I  
 248 L L L L L F L L F L V F F L L L F F F V I V I I  
 247 L L L L L L L L L L L L L L L I I V M L L L L L  
 246 I I I V I I I I I V V I I I C V V V V V G V V  
 245 H H H H H H H H H K H H H H Q R K Q E E G D D  
 244 F F F F F F F L F T F F F F M M M M M M M M  
 243 S S S S S S S S G A Y I S S S P P P A P P P A A  
 242 D D D D D D D D D G S D D D G G G G S T T K K  
 241 F F F F F F F F F L F F F F F F L F L F L L L L  
 240 Q Q Q Q Q Q Q Q Q P Q Q Q Q P K E G G T A G G

**TM6** STE3\_YEAST  
 C59844  
 MAF3\_SCHPO  
 O9UVN2  
 O74282  
 O74284  
 O9UVN4  
 BARG\_SCHCO  
 O74283  
 BARI\_SCHCO  
 O9Y7E7  
 BBR1\_SCHCO  
 O9UVN3  
 PRA1\_LUSTHO  
 PRA1\_LUSTMA  
 O9C1O9  
 O9HEX9  
 O9PH42  
 O9HDG3  
 PRA2\_LUSTMA  
 O9UVG2

235 . . Q R R P P T V E I L T A S L I R I G T  
 234 . . L S S F F S G T G T . G S S I Q I I I  
 233 Q R K T T . . T H K H M R R K S E Q E Q R  
 232 L L G I F V V C T S S S F I I L I I L L  
 231 D D N S C N N N G N S S T T Q A N N N S A  
 230 Q Q A L L N N L L L L F I D A N A V A Q A  
 229 V V V Y Y Y V Y V Y W W S A A I I I I F  
 228 F F V L L L L I I I L A V I A L L L I L  
 227 T T M G G N N V P V S T N S T A L T L V L  
 226 Y F F T Y F F F Y F L Y V G G Y Y F Y Y  
 225 V I I T T A A I A I A A S V V I L I F L  
 224 S S T T T T T G S G G T L Y Y I N T N Q Q  
 223 F F L I I L L L L L L T V I I V L A L G A  
 222 P P P P S S P P P P V I P P V P P P A V  
 221 F F F L L T T V V M I V G F F L L L S A  
 220 M M Y N H N N T T T T L G F F V Y G Y V I  
 219 V V G F L W R C C C W W L L V I L I L L  
 218 L L L L V T T C V M C V L L L T T I T V T  
 217 I I F L L M M M I M M L M M S I I I R A  
 216 I I F E E I I E D E D Q Q D D D I D I E E  
 215 I I V L L T T T V T L V T I I T L V L C C  
 214 F F A T T L L M L L I I I A A V S S S I L  
 213 C C A A A A A A A A A A T T A S A S A A  
 212 F F L L L M M L L L L M M L L L L L L L L  
 211 I T C S S A A A I A L L A V L A G A G A A  
 210 L L L M M I I M M M I M L L I I M I F F  
 209 L L L L L L L L L L L L L L L L L L L L L L  
 208 R R R R R R R R R R R R R R R R R R R R R R  
 207 A S L F F I I L L M L F I V F I L I F F  
 206 F F F Y Y Y Y Y Y Y Y Y Y Y F Y F Y Y  
 205 R R R R R R R R R R R R R R R H R R H R K K  
 204 T T K N H N N S S S S A A S G S R S K K  
 203 L L S V V P P V M A T T P K R I L S L Q Q

**TM7**  
 OPSD\_BOVIN  
 OPSD\_HUMAN  
 OPSB\_HUMAN  
 OPSG\_HUMAN  
 OPSR\_HUMAN  
 B2AR\_HUMAN  
 B2AR\_HUMAN  
 CKR5\_HUMAN  
 TSHR\_MOUSE  
 OLF1\_RAT  
 PF2R\_SHEEP  
 GRHR\_HORSE  
 AA1R\_CHICK  
 ML1C\_XENLA  
 VG74\_KSHV  
 AGPR\_MELGA  
 OLF2\_CANFA  
 DADR\_MACMU  
 PAFR\_CAVPO  
 FSHR\_PIG  
 EDG4\_MOUSE  
 TA2R\_CERAE  
 L4R2\_RAT  
 TRFR\_CHICK

286 I I R L L G E Q N K K P I W V T K I D K A Q A W  
 287 F F L M M L V A S E E V L L G A E T A S V E A F  
 288 M M V A A F Y M K T T N T F L M T F H K E L R L  
 289 T T T A A Q I Q I V V H Y V A P I D Q I K L A L  
 290 I I I L L F L V L M M F I L V F M V V L Y I G F  
 291 P P P P P F L T L A A F A S T T A F T L F Y T C  
 292 A A S A A F N E V M M F I Y S I M V L V L L T R  
 293 F F F F Y W W T L M M L F F L C M W C L L R A I  
 294 F F F F F I I L F Y Y F L M L I Y F L F L V L C  
 295 A A S A A G G G Y T T A T A Q A T G L Y A A A I  
 296 K K K K K Y Y M P V V L H Y A Y V W S P E T F Y  
 297 T S S S S C V T L V V L G F L F V A T I A W F L  
 298 S A A A A N N H N T T N N N Y N T N N N N S N  
 299 A A C T T S S C S P P P S S S S N P S C S S Q S S  
 300 V I I I I S G C C M M C A C A C M S V C L I S A  
 301 Y Y Y Y Y L F I A L L F M L V L L L L A V L V I  
 302 N N N N N N N N N D N N V N N N D N N D N N  
 303 P P P P P P P P P P P P A P P P P P A P P P  
 304 V V I V V V L I F F F L I V L F F I V F V W V V  
 305 I I I I I I I L I I I V I I F I I I L V V L I  
 306 Y Y Y Y Y Y Y Y Y Y Y Y Y Y Y Y Y Y Y Y  
 307 I I C V V T C A A S S G A G S V S A C A S I V N  
 308 M M F F F I R F I L L Y F V C F L F F I C L F L  
 309 M M M M F S V F R R F R L L F R N L F R F T M  
 310 N N N N N P G T N N S I N G G N A T T D R A S

**TM7**  
 Sc  
 Sb  
 Sca  
 sk  
 Su  
 Km  
 Kl  
 Kw  
 Ag  
 Cg  
 Yl  
 Pa  
 Dh  
 Zr  
 Ca  
 Sp  
 Al  
 An  
 Cp  
 Mg  
 Gz  
 Fv  
 Sm  
 Nc

273 G G G G - G G - N N P G K T I G G  
 274 T T T T T V T T Q S D T N D Y P P A F F F F  
 275 D D D D D K N D D W K N E S D E E E E E E E  
 276 V V V T V S T S Y I A V V L G  
 277 L L L L L L L L L L L L L F F L M S S S S  
 278 T T V T V T S V I S N S I Q S S Q A A A G G  
 279 T T T S S S T Y P G A A T Q S H T P S S S S  
 280 V V V I V I L I I V V V V I M N N L L L L I  
 281 A A A A S A A A A G S G S T V V V T T T T  
 282 T T T T T T T V N Y T V Q L Q L L L I L Q Q  
 283 L L L L L L L L L L L A L L L C T T T T T T T  
 284 L L L L L L L L L F M L L L L L L I L S S S S  
 285 A A V V V V V V V V I V I I L V V V V V V V  
 286 V V V T V V T S V V A V V I I I A T V A V V  
 287 L L L L L L L L L L I L L L I I L L L V I I  
 288 S S S S S S S S S S S S M S S S S V I V V  
 289 L L L L L L L L L L L L L L L L L L L L L L  
 290 P P P P P P P P P P P P P P P P P P P P P P  
 291 L L L L L L L L L L L L L L L L L L L L L L  
 292 S S S S S S T S S S S S S S S S G G G G G  
 293 S S S S S S T S S S S S S S S T T I T  
 294 M M M M I I M V I I M M L L I I M L L L L L  
 295 W W W W W W W W W W W W W W V A V V  
 296 A A A A A A A A A A A A A A A A A A A A A  
 297 T T T T S A T T N T N S T Q S G G A Q Q Q Q Q  
 298 A A A S S A S A T A T A T T S F T Q R R R R R  
 299 A A A A A A A A S V A A A A T A T A L I I I  
 300 N N N N N N N N N H V N N N A L I V A A A A  
 301 N N N N T D N N N D N N N L D D K V S T T  
 302 A A A S A A S A S D E N T T K Q K N N S R R R  
 303 S S S S S P S T S E T P S H L A P S N A G G  
 304 K K R H T S R V R M S T S N Q N V F T P L Y

**TM7**  
 STE3\_YEAST  
 O59B44  
 MAP3\_SCHPO  
 Q9UVN2  
 O74282  
 O74284  
 Q9UVN4  
 Q9UVN4  
 BAR3\_SCHCO  
 O74283  
 BAR1\_SCHCO  
 Q9Y7E7  
 BBR1\_SCHCO  
 Q9UVN3  
 PRA1\_USTHO  
 PRA1\_USTMA  
 Q9C1O9  
 Q9HEX9  
 Q9PHI2  
 Q9HDG3  
 PRA2\_USTMA  
 Q9UV52

263 Y Y W L L L L L L L L T F L L M F L F I V  
 264 N S V G A F F T T T T L N S A N N P N L F  
 265 I V P R R R W W R R R R W W R R V R R R R R  
 266 W W P W W W W W W W W W W L Y W W W W W  
 267 L L T S A A A L L C L M S V V A L L L F F  
 268 Y Y V I L M M A P A P V V C C P S A S S T  
 269 V V L V V P P P V P V P P P P I P P P L L  
 270 L L Y F F V V V L V V A V I L L S L S T S  
 271 M M L C C S S S C S C S S S S Y S L S P P  
 272 S S M A A S S A A A A T A A A S G S G A G  
 273 Y Y S L F L L M F F F W L Y Y I I I M I  
 274 L V L L L I I L L I L I I I I L I I A V  
 275 V V F F F F F F F F F F F F F F I F I L L  
 276 F F F F F F F F F F F V F F F F F F F F  
 277 L F S A G L L A A F A A I A A T I L I V V  
 278 I I T F F F F Y L Y L F F M M F F F F F F  
 279 F F S F F F F F F F F F F F F F F F F F  
 280 G G G G G G G G G G G G A G G G G G G G G  
 281 L L G F F F F F F F F F F L L F M V M L L  
 282 G G W A A G G A A A A G G G G G G S G T T  
 283 S T T E Q E E Q S E N N Q Q L E S I S E E  
 284 D D E E E E E E E E D E E E E D D D E D  
 285 A A K A A A A A A A A A A V A A A A A  
 286 L L V R R M M R Q R K V V R R V I M I Q K  
 287 H N A K K K K R K R K E N Q Q S V G V S S  
 288 M M L N Q E E N Q N F E D G G E M E M V A  
 289 Y Y I Y Y Y Y Y Y Y Y Y Y Y Y Y Y Y Y Y  
 290 S S L R R R R A K A S K R K K L K A K K I  
 291 K S W K K K K A R A E R A H E A E R E A G  
 292 F F S A V V V A A A K V A A A I I W I R L  
 293 L L L I F G G W Y W Y L L V F G A Y A W W  
 294 R R L L L A A A W R A N R L H D K R K K Q

Figure 1: The sequence alignments of selected Class A GPCRs (left) and Class D GPCRs of the Ste2- (middle) and Ste3-subfamily (right). The alignments for the Class A representatives and the Ste3-subfamily were taken from the GPCR database (<http://www.gpcr.org>) (1). The receptor sequences for the Ste2 subfamily were downloaded from GenBank (2) as annotated sequences or in the case of some pheromone receptor sequences as open reading frames identified in the genome of partially sequenced organisms (3, 4). Dark gray boxes denote identity and light gray denote similarity in conserved positions. Strongly polar residues are in red. Small and weakly polar residues are indicated by yellow boxed residue numbers. The Ste2 sequences are identified by the initials of the genus and species of the corresponding organism as follows:

Sc, *Saccharomyces cerevisiae*; Sb, *Saccharomyces bayanus*; Sca, *Saccharomyces castellii*; Sk, *Saccharomyces kluyveri*; Su, *Saccharomyces unisporus*; Km, *Kluyveromyces marxianus*; Kl, *Kuyveromyces lactis*; Kw, *Kluyveromyces waltii*; Eg, *Eremothecium gossypii*; Cg, *Candida glabrata*; Yl, *Yarrowia lipolytica*; Pa, *Pichia angusta*; Dh, *Debaryomyces hansenii*; Zr, *Zygosaccharomyces rouxii*; Ca, *Candida albicans*; Sp, *Schizosaccharomyces pombe*; Af, *Aspergillus fumigatus*; An, *Aspergillus nidulans*; Cp, *Coccidioides posadasii*; Mg, *Magnaporthe grisea*; Gz, *Gibberella zeae*; Fv, *Fusarium virguliforme*; Sm, *Sordaria macrospora*; Nc, *Neurospora crassa*.

## REFERENCES

1. Horn, F., Weare, J., Beukers, M. W., Horsch, S., Bairoch, A., Chen, W., Edvardsen, O., Campagne, F., and Vriend, G. (1998) GPCRDB: an information system for G protein-coupled receptors, *Nucleic Acids Res.* 26, 275-279.
2. Benson, D. A., Karsch-Mizrachi, I., Lipman, D. J., Ostell, J., and Wheeler, D. L. (2004) GenBank: update, *Nucleic Acids Res.* 32, D23-D26.



3. Dujon, B., Sherman, D., Fischer, G., Durrens, P., Casaregola, S., Lafontaine, I., de Montigny, J., Marck, C., Neuveglise, C., Talla, E., Goffard, N., Frangeul, L., Aigle, M., Anthouard, V., Babour, A., Barbe, V., Barnay, S., Blanchin, S., Beckerich, J. M., Beyne, E., Bleykasten, C., Boisrame, A., Boyer, J., Cattolico, L., Confanioleri, F., de Daruvar, A., Despons, L., Fabre, E., Fairhead, C., Ferry-Dumazet, H., Groppi, A., Hantraye, F., Hennequin, C., Jauniaux, N., Joyet, P., Kachouri, R., Kerrest, A., Koszul, R., Lemaire, M., Lesur, I., Ma, L., Muller, H., Nicaud, J. M., Nikolski, M., Oztas, S., Ozier-Kalogeropoulos, O., Pellenz, S., Potier, S., Richard, G. F., Straub, M. L., Suleau, A., Swennen, D., Tekaia, F., Wesolowski-Louvel, M., Westhof, E., Wirth, B., Zeniou-Meyer, M., Zivanovic, I., Bolotin-Fukuhara, M., Thierry, A., Bouchier, C., Caudron, B., Scarpelli, C., Gaillardin, C., Weissenbach, J., Wincker, P., and Souciet, J. L. (2004) Genome evolution in yeasts, *Nature* 430, 35-44.
4. Dietrich, F. S., Voegeli, S., Brachat, S., Lerch, A., Gates, K., Steiner, S., Mohr, C., Pohlmann, R., Luedi, P., Choi, S. D., Wing, R. A., Flavier, A., Gaffney, T. D., and Phillippsen, P. (2004) The *Ashbya gossypii* genome as a tool for mapping the ancient *Saccharomyces cerevisiae* genome, *Science* 304, 304-307.
