# Supplementary material
Source: PubMed Central journal article supplement (PMC1382269)
Supplement: NIHMS7260-supplement-Supp_Tab.pdf [file NIHMS7260-supplement-Supp_Tab.pdf]

**Table 1. Conserved Residues in Ste2**

| Conserved residues | Mutant substitution | Phenotype                         | Ref.     |
|--------------------|---------------------|-----------------------------------|----------|
| Ile53              | A, F, L, C          | WT                                | unpub.   |
| Gly60              | A, L                | Decreased dimerization            | (1)      |
| Ala61              |                     |                                   |          |
| Ile67 (med)        | T                   | CAM                               | (2)      |
| Phe81 (med)        | C                   | WT                                | unpub.   |
| Asn84              | S,A,Q,C             | CAM                               | (3)      |
| Leu88              |                     |                                   |          |
| Tyr101 (med)       |                     |                                   |          |
| Leu138 (med)       | R                   | DN sup                            | (4)      |
| Glu143 (med)       | K, R                | LOF                               | (5)      |
|                    | A, G                | CAM                               | (6)      |
|                    | K                   | DN sup                            | (4)      |
|                    | C                   | WT                                | (2)      |
| Leu146             | R, P                | LOF                               | (5)      |
|                    | Q                   | DN sup/sst                        | (4)      |
|                    | M                   | WT                                | (2)      |
| Gln149             | R, P, V, A, T       | CAM                               | (3)      |
|                    | G, H, N             | Sst                               | (3)      |
|                    | N, R                | DN sup                            | (4)      |
|                    | R, K, P             | LOF                               | (5)      |
|                    | R                   | CAM                               | (6)      |
|                    | H, L                | WT                                | (2)      |
| Ser170             | F, C                | F=WT; C=LOF                       | (2)      |
| Ile209 (med)       | C                   | WT                                | (7)      |
| Ser214             | C, L                | WT                                | (2, 7)   |
| Ile215             | C, L                | WT                                | (2, 7)   |
| Phe217 (med)       | C, L                | WT                                | (2, 7)   |
| Lys225             | C, N, E             | LOF                               | (2, 7)   |
|                    | R                   | DN sup                            | (4)      |
|                    | I                   | CAM                               | (2)      |
| Leu226             | C, V                | WT                                | (2, 7)   |
|                    | W                   | CAM                               | (6)      |
| many IL3 residues  |                     |                                   |          |
| Leu247             | C                   | WT                                | (7)      |
| Ile249             | C, M                | WT                                | (2, 7)   |
|                    | T                   | Partial LOF                       | (2)      |
| Gln253             | C, L                | CAM                               | (7, 8)   |
| Pro258             | L                   | CAM                               | (9)      |
|                    | M,Y,L,I,F, etc      | CAM                               | (10)     |
| Tyr266 (med)       | C,D,A               | LOF DN                            | (11, 12) |
|                    | F                   | WT                                | (2)      |
| Leu287 (med)       | F                   | No preActiv. complex              | (13)     |
|                    | P                   | Partial LOF                       | (2)      |
| Leu289             | S                   | CAM, DN sup                       | (4)      |
| Pro290             | C                   | Partial LOF (trafficking problem) | unpub.   |

|        |   |                                   |        |
|--------|---|-----------------------------------|--------|
| Leu291 | C | WT                                | unpub. |
| Trp295 | C | Partial LOF (trafficking problem) | unpub. |
| Ala296 | T | CAM DN sup                        | (4)    |
|        | P | CAM                               | (2)    |

Phenotypes: WT            wildtype  
CAM            constitutively active mutant  
LOF            loss of function  
Sst            supersensitive  
DN sup        suppressor of dominant negative mutation

**Table 2. Small Group Conserved Residues in Ste2**

| Group conserved residue | Mutant substitution | Phenotype              | Ref.        |
|-------------------------|---------------------|------------------------|-------------|
| Gly56                   | A, L                | Decreased dimerization | (1)         |
| Gly60                   | A, L                | Decreased dimerization | (1)         |
| Ala61                   |                     |                        |             |
| Ala62                   |                     |                        |             |
| Ser87                   | N                   | CAM                    | (2)         |
| Thr131                  | C                   | WT                     | (14)        |
| Ser145                  | P                   | LOF                    |             |
|                         | L                   | Sst/CAM                | (6, 15)     |
|                         | L, T                | DN sup                 | (4)         |
| Ser170                  | F, C                | F=WT; C=LOF            | (2)         |
| Gly174                  | C                   | WT                     | (14)        |
| Ala185                  | P                   | DN                     | (11)        |
|                         | C                   | WT                     | (14)        |
| Ala212                  | C                   | WT                     | (7)         |
|                         | P, G                | CAM                    | (2)         |
|                         | V                   | CAM DN sup             | (4)         |
| Ser214                  | C, L                | WT                     | (2, 7)      |
| Ser219                  | C                   | WT                     | (7)         |
|                         | P                   | Antag response         | (16)        |
| Cys252 (weak)           | L, A                | WT                     | (7, 8)      |
|                         | G                   | DN sup                 | (4)         |
| Ser254                  | F,G,L,W,V,C         | CAM                    | (7, 8)      |
| Ala281                  | C                   | CAM                    | (14)        |
|                         | T                   | DN sup/CAM             | (4)         |
| Ser288                  | A, P                | CAM                    | (6, 8)      |
| Ser292                  | A                   | CAM                    | (8)         |
| Ser293                  | A, C                | WT                     | (8), unpub. |

Phenotypes: WT                      wildtype  
CAM                                constitutively active mutant  
LOF                                 loss of function  
Sst                                 supersensitive  
DN sup                            suppressor of dominant negative mutation

**Table 3. Polar Residues in Ste2**

| Polar  | Mutant substitution | Phenotype | Ref.    |
|--------|---------------------|-----------|---------|
| Gln51  | C                   | WT        | (14)    |
| Arg58  | G, E                | weak LOF  | (5)     |
|        | D                   | WT        | (5)     |
| Asn84  | S,A,Q,C             | CAM       | (3)     |
| Gln85  | A, C, E             | WT        | (2, 3)  |
|        | P                   | LOF       | (17)    |
| His94  |                     |           |         |
| Lys100 | C                   | WT        | (14)    |
| Asn132 | I, Y                | DN        | (11)    |
|        | T, C                | WT        | (2, 14) |
| Gln135 | P                   | DN        | (11)    |
|        | C                   | WT        | (14)    |
| Glu143 | K, R                | LOF       | (5)     |
|        | A, G                | CAM       | (6)     |
|        | K                   | DN Sup    | (4)     |
|        | C                   | WT        | (2)     |
| Gln149 | R, P, V, A, T       | CAM       | (3)     |
|        | G, H, N             | Sst       | (3)     |
|        | N, R                | DN sup    | (4)     |
|        | R, K, P             | LOF       | (5)     |
|        | R                   | CAM       | (6)     |
|        | H, L                | WT        | (2)     |
| Lys187 | C                   | WT        | (14)    |
| Asn216 | D                   | weak CAM  | (18)    |
|        | D, Y                | DN sup    | (4)     |
|        | C                   | WT        | (7)     |
| Lys225 | C, N, E             | LOF       | (2, 7)  |
|        | R                   | DN sup    | (4)     |
|        | I                   | CAM       | (2)     |
| Gln253 | C, L                | CAM       | (7, 8)  |
| Asp275 | V                   | DN        | (11)    |
|        | C                   | WT        | (14)    |

Phenotypes: WT                      wildtype  
CAM                                constitutively active mutant  
LOF                                 loss of function  
Sst                                 supersensitive  
DN sup                             suppressor of dominant negative mutation

## REFERENCES

1. Overton, M. C., Chinault, S. L., and Blumer, K. J. (2003) Oligomerization, biogenesis, and signaling is promoted by a glycoporphin A-like dimerization motif in transmembrane domain 1 of a yeast G protein-coupled receptor, *J. Biol. Chem.* *278*, 49369-49377.
2. Martin, N. P., Celic, A., and Dumont, M. E. (2002) Mutagenic mapping of helical structures in the transmembrane segments of the yeast  $\alpha$ -factor receptor, *J. Mol. Biol.* *317*, 765-788.
3. Parrish, W., Eilers, M., Ying, W. W., and Konopka, J. B. (2002) The cytoplasmic end of transmembrane domain 3 regulates the activity of the *Saccharomyces cerevisiae* G-protein-coupled  $\alpha$ -factor receptor, *Genetics* *160*, 429-443.
4. Lin, J. C., Duell, K., Saracino, M., and Konopka, J. B. (2005) Identification of residues that contribute to receptor activation through the analysis of compensatory mutations in the G protein-coupled  $\alpha$ -factor receptor, *Biochemistry* *44*, 1278-1287.
5. Sommers, C. M., and Dumont, M. E. (1997) Genetic interactions among the transmembrane segments of the G protein coupled receptor encoded by the yeast STE2 gene, *J. Mol. Biol.* *266*, 559-575.
6. Sommers, C. M., Martin, N. P., Akal-Strader, A., Becker, J. M., Naider, F., and Dumont, M. E. (2000) A limited spectrum of mutations causes constitutive activation of the yeast  $\alpha$ -factor receptor, *Biochemistry* *39*, 6898-6909.
7. Dube, P., DeCostanzo, A., and Konopka, J. B. (2000) Interaction between transmembrane domains five and six of the  $\alpha$ -factor receptor, *J. Biol. Chem.* *275*, 26492-26499.
8. Dube, P., and Konopka, J. B. (1998) Identification of a polar region in transmembrane domain 6 that regulates the function of the G protein-coupled  $\alpha$ -factor receptor, *Mol. Cell. Biol.* *18*, 7205-7215.

9. Konopka, J. B., Margarit, S. M., and Dube, P. (1996) Mutation of pro-258 in transmembrane domain 6 constitutively activates the G protein-coupled  $\alpha$ -factor receptor, *Proc. Natl. Acad. Sci. USA* **93**, 6764-6769.
10. Stefan, C. J., Overton, M. C., and Blumer, K. J. (1998) Mechanisms governing the activation and trafficking of yeast G protein-coupled receptors, *Mol. Biol. Cell* **9**, 885-899.
11. Dosil, M., Giot, L., Davis, C., and Konopka, J. B. (1998) Dominant-negative mutations in the G-protein-coupled  $\alpha$ -factor receptor map to the extracellular ends of the transmembrane segments, *Mol. Cell. Biol.* **18**, 5981-5991.
12. Lee, B. K., Lee, Y. H., Hauser, M., Son, C. D., Khare, S., Naider, F., and Becker, J. M. (2002) Tyr266 in the sixth transmembrane domain of the yeast  $\alpha$ -factor receptor plays key roles in receptor activation and ligand specificity, *Biochemistry* **41**, 13681-13689.
13. Dosil, M., Schandel, K. A., Gupta, E., Jenness, D. D., and Konopka, J. B. (2000) The C terminus of the *Saccharomyces cerevisiae*  $\alpha$ -factor receptor contributes to the formation of preactivation complexes with its cognate G protein, *Mol. Cell. Biol.* **20**, 5321-5329.
14. Lin, J. C., Duell, K., and Konopka, J. B. (2004) A microdomain formed by the extracellular ends of the transmembrane domains promotes activation of the G protein-coupled  $\alpha$ -factor receptor, *Mol. Cell. Biol.* **24**, 2041-2051.
15. Marsh, L. (1992) Substitutions in the hydrophobic core of the  $\alpha$ -factor receptor of *Saccharomyces cerevisiae* permit response to *Saccharomyces kluyveri*  $\alpha$ -factor and to antagonist, *Mol. Cell. Biol.* **12**, 3959-3966.
16. Abel, M. G., Lee, B. K., Naider, F., and Becker, J. M. (1998) Mutations affecting ligand specificity of the G-protein-coupled receptor for the *Saccharomyces cerevisiae* tridecapeptide pheromone, *Biochim. Biophys. Acta-Mol. Cell Res.* **1448**, 12-26.
17. Leavitt, L. M., Macaluso, C. R., Kim, K. S., Martin, N. P., and Dumont, M. E. (1999) Dominant negative mutations in the  $\alpha$ -factor receptor, a G protein-coupled receptor encoded by the STE2 gene of the yeast *Saccharomyces cerevisiae*, *Mol. Gen. Genet.* **261**, 917-932.

18. Parrish, W. R. (2001) The cytoplasmic end of transmembrane domain three regulates the activity of the G protein-coupled  $\alpha$ -factor receptor, Ph.D. Thesis, Department of Molecular Microbiology, State University of New York at Stony Brook, Stony Brook, NY.
